# Supplementary material
Source: publisher figshare collection journal article supplement (https://acs.figshare.com/ndownloader/files/4167457)
Supplement: Supplementary file 1 [file 4167457]

## Supporting Information

### Au-Pd Alloy and Core-Shell Nanostructures: One-Pot Co-Reduction Preparation, Formation Mechanism and Electrochemical Properties

*Long Kuai, Xue Yu, Shaozhen Wang, Yan Sang and Baoyou Geng\**

*College of Chemistry and Materials Science, Anhui Key Laboratory of Functional Molecular Solids, Anhui Laboratory of Molecular-Based Materials, Anhui Normal University, Wuhu 241000, P. R. China*

Corresponding author's E-mail: [bygeng@mail.ahnu.edu.cn](mailto:bygeng@mail.ahnu.edu.cn)

### Additional Figures and Figure Captions

**Figure S1**

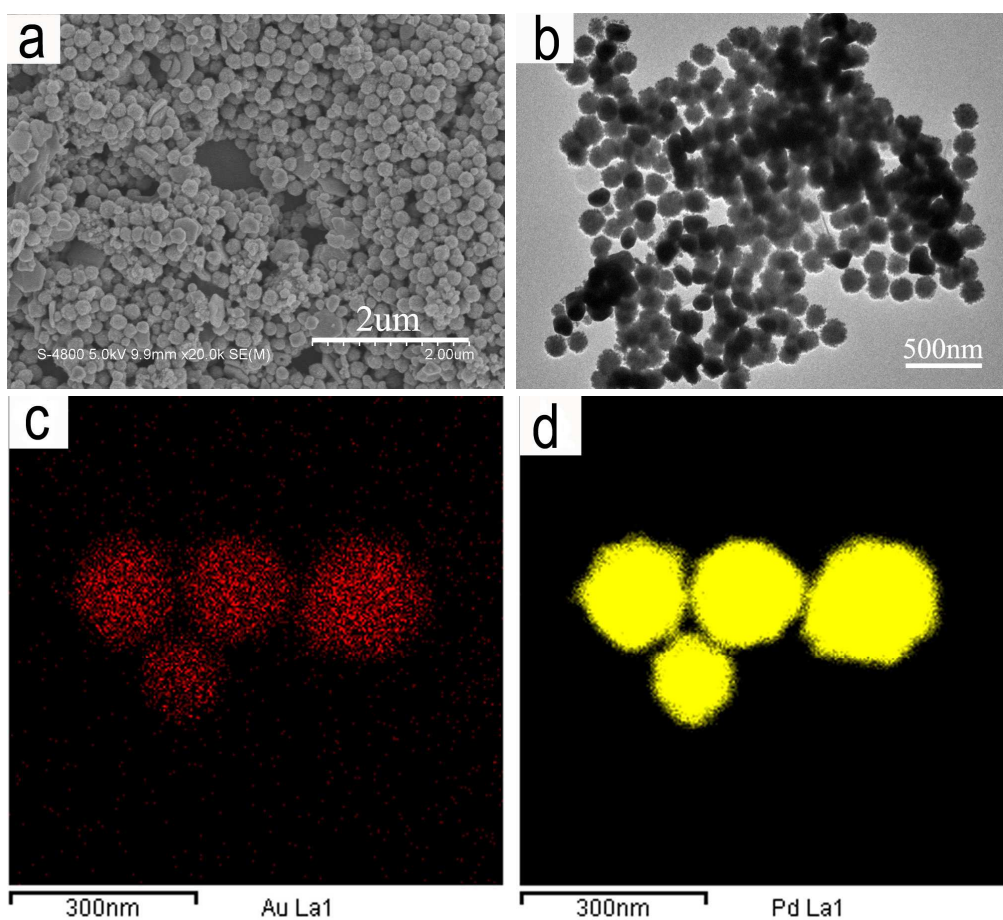

**Figure S1:** SEM (a), TEM (b), and HAADF-STEM-EDS mapping images of Au (a) and Pd (d) elements.

**Figure S2**

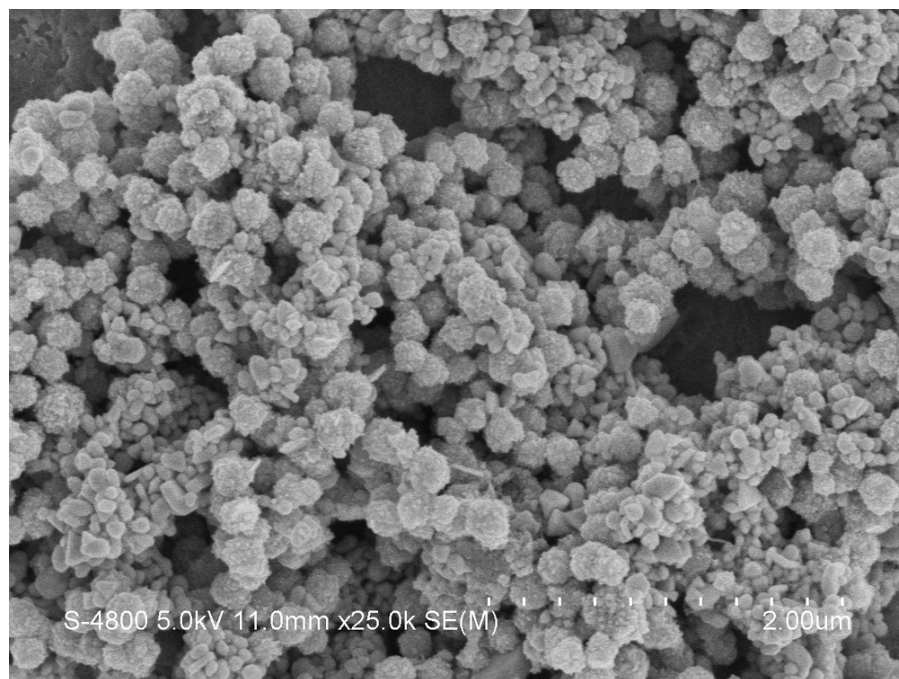

**Figure S2:** The SEM image of the products obtained only with CTAB.

**Figure S3**

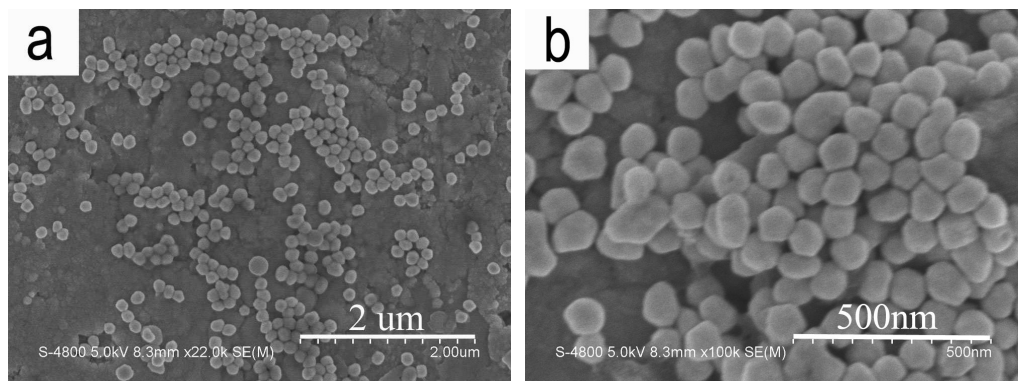

**Figure S3:** The low (a) and high (b) magnification SEM images of the obtained products with the reaction temperature of 160 °C without CTAB.
